# Supplementary material for: Production of phenols from a cyclic sugar alcohol in high-temperature water over a charcoal-supported platinum catalyst
Source: Royal Society of Chemistry journal article supplement (doi:10.1039/d5ra09573e), 2026-01-01
Supplement: d5ra09573e1.pdf [file d5ra09573e1.pdf]

## Supplementary Information

### **Production of phenols from a cyclic sugar alcohol in high-temperature water over a charcoal-supported platinum catalyst**

Kiyoyuki Yamazaki\*, Rumiko Samata, Norihito Hiyoshi, Osamu Sato, Aritomo Yamaguchi

*Research Institute for Chemical Process Technology, National Institute of Advanced Industrial Science*

*and Technology (AIST), 4-2-1 Nigatake, Miyagino, Sendai 983-8551, Japan*

## Detailed operating conditions of GC

The gaseous products were collected with a glass syringe and analyzed using a gas chromatograph (Shimadzu GC-8A) equipped with a Shincarbon ST column and a thermal conductivity detector. The oven temperature was initially set at 50 °C, increased to 200 °C at a rate of 10 °C min<sup>-1</sup> over 15 min, and then held at 200 °C until the total analysis time reached 50 min.

The Liquid products in the filtrate were quantitatively analyzed using a second gas chromatograph (Agilent HP-6890) equipped with a DB-WAX capillary column and a flame ionization detector. Either 1-propanol or 1-butanol was used as the internal standard. For the analysis, the filtrate was diluted and mixed with the internal standard in a vial. The oven temperature was initially set at 80 °C and held for 5 min, then increased to 230 °C at a rate of 5 °C min<sup>-1</sup> over 30 min, and finally maintained at 230 °C until the total analysis time reached 60 min.

### **Product distribution identified by GC-MS**

The *myo*-inositol conversion was repeated three times under identical conditions (Pt/C in water at 250 °C for 1 h). All byproducts identified by GC-MS (Agilent 5977A MSD) analysis are summarized in Table S1. The standard errors of the yields of aromatic compounds, gaseous products, and solid residues were calculated within the  $2\sigma$  range and included in Table S1.

**Table S1**

Results of *myo*-inositol conversion into aromatic compounds over Pt/C in water at 250 °C for

1 h. Gas composition shown in parentheses.

| Catalyst                             | 5%Pt/C      |
|--------------------------------------|-------------|
| Aromatic compounds<br>yield (C%)     | 42±1.4      |
| Phenol                               | 34          |
| Catechol                             | 6.7         |
| Resorcinol                           | 0.90        |
| Hydroquinone                         | 0.0         |
| <i>p</i> -Cresol                     | 0.02        |
| 3-Propylphenol                       | 0.02        |
| Benzene                              | 0.65        |
| <i>p</i> -Xylene                     | 0.79        |
| Indane                               | 0.03        |
| Naphthalene                          | 0.11        |
| Bibenzyl                             | 0.06        |
| Non-aromatic<br>compounds yield (C%) | 0.27±0.0016 |
| Cyclohexanone                        | 0.08        |
| 1,2,3-Cyclohexanetriol               | 0.17        |
| Gas yield (C%)                       | 35±6.0      |
| H <sub>2</sub>                       | - ( 1.7)    |
| CH <sub>4</sub>                      | 0. ( 3.5)   |
| CO <sub>2</sub>                      | 27 (89)     |
| C <sub>2</sub> H <sub>6</sub>        | ( 5.9)      |
| Solid yield (wt%)                    | 1.0±0.95    |

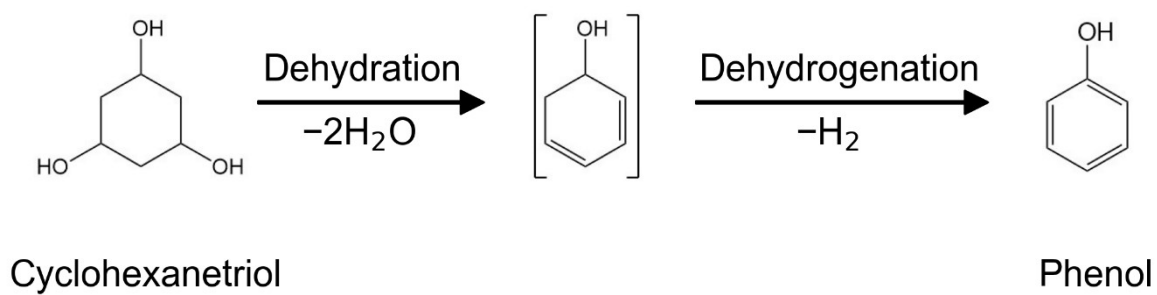

**Scheme S1** Plausible reaction routes from cyclohexanetriol to phenol

**Table S2**

Gas and solid yields from the conversion of *myo*-inositol over Pt/C catalyst at various reaction temperatures (Pt/C 0.15 g; *myo*-inositol 0.20 g; water 1.0 g; reaction time 1 h)

| Temperature (°C) | Gas yield (C%) | Gas composition (%) |                 |                 |                               | Solid yield (wt%) |
|------------------|----------------|---------------------|-----------------|-----------------|-------------------------------|-------------------|
|                  |                | H <sub>2</sub>      | CH <sub>4</sub> | CO <sub>2</sub> | C <sub>2</sub> H <sub>6</sub> |                   |
| 200              | 26             | 0.1                 | 3.4             | 90              | 6.7                           | 20                |
| 250 <sup>a</sup> | 31             | 1.7                 | 3.5             | 89              | 5.9                           | 2.6               |
| 300              | 35             | 3.5                 | 3.3             | 89              | 4.7                           | 2.4               |

<sup>a</sup> Data were taken from Table 1.

**Table S3**

Gas and solid yields from the conversion of *myo*-inositol over Pt/C catalyst with various water amounts (Pt/C 0.15 g; *myo*-inositol 0.20 g; reaction temperature 250 °C; reaction time 1 h)

| Weight of water (g) | Gas yield (C%) | Gas composition (%) |                 |                 |                               | Solid yield (wt%) |
|---------------------|----------------|---------------------|-----------------|-----------------|-------------------------------|-------------------|
|                     |                | H <sub>2</sub>      | CH <sub>4</sub> | CO <sub>2</sub> | C <sub>2</sub> H <sub>6</sub> |                   |
| 0.5                 | 15             | 1.4                 | 3.3             | 92              | 3.4                           | 12                |
| 1.0 <sup>a</sup>    | 31             | 1.7                 | 3.5             | 89              | 5.9                           | 2.6               |
| 2.0                 | 18             | 2.1                 | 3.1             | 89              | 6.1                           | 0.8               |
| 3.0                 | 13             | 2.5                 | 3.4             | 88              | 6.0                           | 0.0               |

<sup>a</sup> Data were taken from Table 1.

**Table S4**

Gas and solid yields from the conversion of *myo*-inositol over Pt/C catalyst with different reaction times (Pt/C 0.15 g; *myo*-inositol 0.20 g; water 1.0 g; reaction temperature 250 °C)

| Reaction time (min) | Gas yield (C%) | Gas composition (%) |                 |                 |                               | Solid yield (wt%) |
|---------------------|----------------|---------------------|-----------------|-----------------|-------------------------------|-------------------|
|                     |                | H <sub>2</sub>      | CH <sub>4</sub> | CO <sub>2</sub> | C <sub>2</sub> H <sub>6</sub> |                   |
| 30                  | 33             | 1.3                 | 2.8             | 90              | 6.1                           | 1.0               |
| 60 <sup>a</sup>     | 31             | 1.7                 | 3.5             | 89              | 5.9                           | 2.6               |
| 120                 | 40             | 0.3                 | 3.0             | 91              | 5.6                           | 0.2               |

<sup>a</sup> Data were taken from Table 1.



**Table S5**

Gas and solid yields from the conversion of phenolic compounds over Pt/C catalyst (Pt/C

0.15 g; phenolic compounds 0.20 g; water 1.0 g; reaction temperature 250 °C; reaction time

1 h)

| Phenolic compound       | Gas yield (C%) | Gas composition (%) |                 |                 |                               | Solid yield (wt%) |
|-------------------------|----------------|---------------------|-----------------|-----------------|-------------------------------|-------------------|
|                         |                | H <sub>2</sub>      | CH <sub>4</sub> | CO <sub>2</sub> | C <sub>2</sub> H <sub>6</sub> |                   |
| Catechol                | 12             | 0.7                 | 0.0             | 99              | 0.0                           | 3.2               |
| Resorcinol              | 2.6            | 0.5                 | 0.0             | 99              | 0.0                           | 4.1               |
| Hydroquinone            | 6.7            | 0.0                 | 0.0             | 99              | 0.0                           | 3.5               |
| 1,2,3-Trihydroxybenzene | 21             | 0.4                 | 0.0             | 99              | 0.2                           | 8.6               |
| 1,2,4-Trihydroxybenzene | 12             | 0.2                 | 1.2             | 98              | 0.3                           | 29                |
| 1,3,5-Trihydroxybenzene | 12             | 1.1                 | 0.7             | 98              | 0.0                           | 28                |

**Table S6**

Gas and solid yields from the recycling test (Pt/C 0.15 g; *myo*-inositol 0.20 g; water 1.0 g;

reaction temperature 250 °C; reaction time 1 h)

| Number of uses | Gas yield (C%) | Gas composition (%) |                 |                 |                               | Solid yield (wt%) |
|----------------|----------------|---------------------|-----------------|-----------------|-------------------------------|-------------------|
|                |                | H <sub>2</sub>      | CH <sub>4</sub> | CO <sub>2</sub> | C <sub>2</sub> H <sub>6</sub> |                   |
| 1 <sup>a</sup> | 31             | 1.7                 | 3.5             | 89              | 5.9                           | 2.6               |
| 2              | 21             | 1.4                 | 4.2             | 90              | 4.7                           | 0.0               |
| 3              | 24             | 0.6                 | 2.7             | 92              | 4.9                           | 1.2               |

<sup>a</sup> Data were taken from Table 1.
